# Supplementary material
Source: publisher figshare collection journal article supplement (https://rs.figshare.com/ndownloader/files/39643605)
Supplement: Supplementary file 1 [file 39643605]

**Electronic supplementary material**

**Location Location Location: survival of Antarctic biota requires the best real-estate**

Mark I. Stevens and Andrew N. Mackintosh

*Biology Letters*, 2023, <https://doi.org/10.1098/rsbl>.2022.0590

Dataset can be downloaded from Dryad here: https://doi.10.5061/dryad.zw3r228bx

**Data collection.** We focussed on ice-free terrain represented by 15 currently recognized Antarctic Conservation Biodiversity Regions (ACBRs) [1]; we do not include South Orkney Islands. We compiled all published occurrence records for all springtail species considered to be endemic or native from these 15 ACBRs [2-21] and from our own unpublished records. We obtained the ten geothermal sites used in the analyses by Fraser et al. [22] from their Table S6. We compiled the geochronological data from all known cosmogenic-nuclide data from Antarctica (<https://www.ice-d.org/>) and from publications which were used to scrutinise the datasets. Cosmogenic dating is uniquely suited to Antarctic environments [23], however, there are problematic samples and locations. We include a selection of cosmogenic datasets to represent sites which clearly (or potentially) delineate Last Glacial Maximum surface elevations, and reject datasets where results are inconclusive due to isotope inheritance or incomplete or inconclusive results. From the included datasets we divided cosmogenic sites into two categories based on the 100 km radius around each site (using the criteria from Fraser et al. [22]): (1) those that showed unequivocal endemism; and (2) those where the provenance was equivocal. Setting these criteria, and using springtails as a proxy, was critical to identifying regions where glacial refuges for the vast majority of biota were most likely to have occurred.

**Software and file formats used.** All maps were created using the Antarctic GIS package ‘Quantarctica’ (<https://www.qgis.org/en/site/about/case_studies/antarctica.html>; [24]) in QGIS ver. 3.22.7 [25]. The ACBRs shown in figure 1 and Supplementary figures S1-S7 are included in an ‘Environmental management’ layer within Quantarctica and colours were chosen to match those used previously [1]. For the land topography of Antarctica we used the shapefiles from ‘Bedmachine’ [26] (downloaded from NSIDC, <https://nsidc.org/data/nsidc-0756/versions/2>) in QGIS ver. 3.22.7. Each input data file was saved as .csv files and imported individually into QGIS for: (1) all individual springtail occurrences (separated into each species), (2) geothermal sites (separated into large and small), (3) geochronological dated sites (separated into high refuge support, and low refuge support), and (4) eDNA signals of springtails. These data were then used to create figures 1 and 2 in the main manuscript, and for more detailed information in figures S1-S7 in Supplementary material.

**Compiled data accessibility.** The .csv data files we used in QGIS for springtail records, geothermal and geochronological sites shown in the two main manuscript figures (figures 1 and 2) and the focused fine-detailed figures (figures S1-S7), to reveal greater resolution of detail in each region, are available at the Royal Society's figshare portal. We also include our QGIS file used to generate the supplementary figures (QGIS_suppl_figs.qgz) and the .qlr ‘layer definition file’ (All_layers_definition_QGIS.qlr) exported from QGIS, which can be imported into QGIS with Qantarctica along with Bedmachine, which maintains the symbols and colours we used in our figures to explore this data further.

References used in Supplementary material

1. Terauds A, Lee JR. 2016 Antarctic biogeography revisited: updating the Antarctic Conservation Biogeographic Regions. *Divers. Distrib.* **22**, 836–840. (doi:10.1111/ddi.12453)

Carpenter G. 1902 Aptera: Collembola, Insecta, chap 9. The report on the collections of natural history made in the Antarctic regions during the voyage of the Southern Cross. British Museum (Natural History), London, pp 221–223.

1. Baird HP, Janion-Scheepers C, Stevens MI, Leihy RI, Chown SL. 2019 The ecological biogeography of indigenous and introduced Antarctic springtails. *J. Biogeogr.* **46**, 1959–1973. (doi:10.1111/jbi.13639)
2. Bowra GT, Holdgate MW, Tilbrook PJ. 1966 Biological investigations in Tottanfjella and central Heimefrontfjella. *Br. Antarct. Surv. Bull.* **9**, 63–70.
3. Collins GE, Hogg ID, Convey P, Barnes AD, McDonald IR. 2019 Spatial and temporal scales matter when assessing the species and genetic diversity of springtails (Collembola) in Antarctica. *Front. Ecol. Evol.* **7**, 76. (doi:10.3389/fevo.2019.00076)
4. Collins GE, Hogg ID, Convey P, Sancho LG, Cowan DA, Lyons WB, Adams BJ, Wall DH, Green TGA. 2020 Genetic diversity of soil invertebrates corroborates timing estimates for past collapses of the West Antarctic Ice Sheet. *Proc. Natl. Acad. Sci. U.S.A.* **117**, 22293–22302. (doi:10.1073/pnas.20079 25117)
5. Enríquez N, Tejedo P, Benayas J, Albertos B, Luciáñez MJ. 2018 Collembola of Barrientos Island, Antarctica: first census and assessment of environmental factors determining springtail distribution. *Polar Biol.* **41**, 713–725. (doi:10.1007/s00300-017-2230-0)
6. Lee KL *et al*. 2019 Biotic interactions are an unexpected yet critical control on the complexity of an abiotically driven polar ecosystem. *Commun. Biol*. **2**, 62. (doi:10.1038/s42003-018-0274-5)
7. McGaughran A, Terauds A, Convey P, Fraser CI. 2019 Genome-wide SNP data reveal improved evidence for Antarctic glacial refugia and dispersal of terrestrial invertebrates. *Mol. Ecol.* **28**, 4941–4957. (doi:10.1111/mec.15269)
8. McGaughran A, Stevens MI, Hogg ID, Carapelli A. 2011 Extreme Glacial Legacies: A Synthesis of the Antarctic Springtail Phylogeographic Record. *Insects* **2**, 62–82. (doi:10.3390/insects2020062)
9. McGaughran A, Stevens MI, Holland B. 2010 Biogeography of circum-Antarctic springtails. *Mol. Phylogenet. Evol.* **57**, 48–58. (doi:10.1016/j.ympev.2010.06.003)
10. Ohyama, Y, S. Hiruta. 1995. The Terrestrial Arthropods of Sør Rondane in Eastern Dronning Maud Land, Antarctica, with Biogeographical Notes. *Polar Biol.* **15**, 341–347.
11. Stevens MI, Greenslade P, D’Haese CA. 2021 Species diversity in *Friesea* (Neanuridae) reveals similar biogeographic patterns among Antarctic Collembola. *Zool. Scr.* **50**, 647–657. (doi:10.1111/zsc.12490)
12. Stevens MI, Greenslade P, Hogg ID, Sunnucks P. 2006 Examining Southern Hemisphere springtails: could any have survived glaciation of Antarctica? *Mol. Biol. Evol.* **23**, 874–882. (doi:10.1093/molbev/msj073)
13. Stevens MI, Hogg ID. 2002 Expanded distributional records of Collembola and Acari in southern Victoria Land, Antarctica. *Pedobiologia* **46**, 485–496. (doi:10.1078/0031-4056-00154)
14. Stevens MI, D’Haese CA. 2014 Islands in ice: isolated populations of *Cryptopygus sverdrupi* (Collembola) among nunataks in the Sør Rondane Mountains, Dronning Maud Land, Antarctica. *Biodiversity* **15**, 169–177 (doi:10.1080/14888386.2014.928791)

Willem V. 1901 Les Collemboles recueillis par l’Expedition Antarctique Belge. *Annales de la Société entomologique de Belgique* **45**, 260–262.

Willem V. 1902 Collemboles Expédition Antarctique Belge Résultants du voyage du S. Y. Belgica 1897–1899. *Rapports scientifique Zoologie* **9**, 1–19.

1. Wise KAJ. 1967 Collembola (Springtails). *Antarct. Res. Ser.* **10**, 123–148. (doi:10.1029/AR010p0123)
2. Wise KAJ. 1971 The Collembola of Antarctica. *Pac. Insects Monogr.* **25**, 57–74.
3. Wise KAJ, Gressitt JL. 1965 Far southern animals and plants. *Nature* **207**, 101–102. (doi:10.1038/207101a0)
4. Fraser CI, Terauds A, Smellie J, Convey P, Chown SL. 2014 Geothermal activity helps life survive glacial cycles. *Proc. Natl. Acad. Sci. U.S.A.* **111**,5634. (doi:10.1073/pnas.132143711)
5. Balco G. 2011 Contributions and unrealized potential contributions of cosmogenic-nuclide exposure dating to glacier chronology, 1990–2010. *Quat. Sci. Rev.* **30**, 3–27. (doi:10.1016/j.quascirev.2010.11.003)
6. Matsuoka K *et al.* 2021 Quantarctica, an integrated mapping environment for Antarctica, the Southern Ocean, and sub-Antarctic islands. *Environ. Model. Softw.* **140**, 105015. (doi:10.1016/j.envsoft.2021.105015)
7. QGIS.org, 2022. QGIS 3.22.7 LTR. Geographic Information System. QGIS Association. (2022) http://www.qgis.org
8. Morlighem M. 2020 MEaSUREs BedMachine Antarctica, Version 2 [Data Set]. Boulder, Colorado USA. NASA National Snow and Ice Data Center Distributed Active Archive Center. Date Accessed 09-16-2022. (doi:10.5067/E1QL9HFQ7A8M)
